# Supplementary material for: Preparation of surface molecularly imprinted Ru-complex catalysts for asymmetric transfer hydrogenation in water media
Source: Royal Society of Chemistry journal article supplement (doi:10.1039/c0dt00950d), 2010-12-17
Supplement: c0dt00950d.pdf [file c0dt00950d.pdf]

## Supporting Information 1:

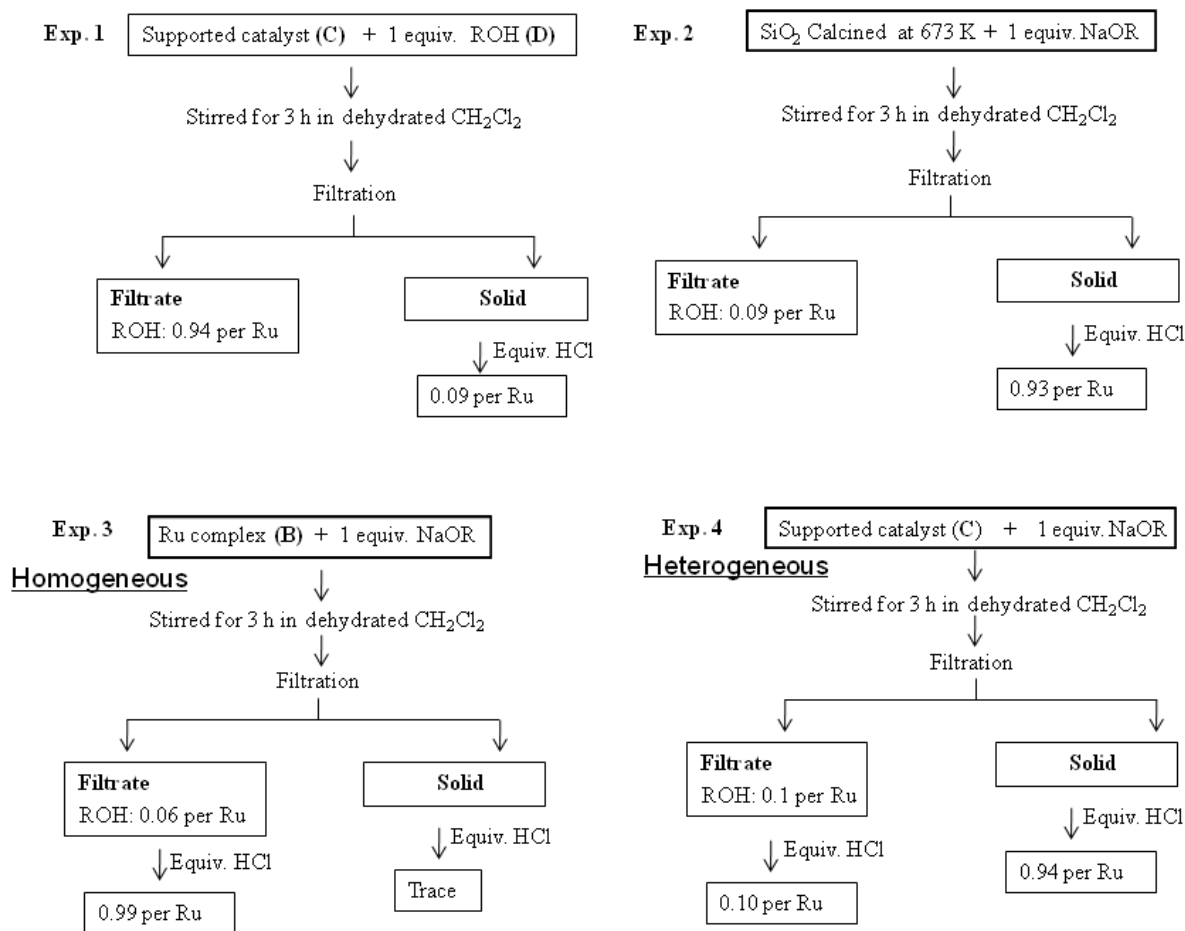

Figure Quantitative analyses of the coordination of the template (D) on the homogeneous and heterogeneous Ru complexes. Exp. 1: Measurement of the adsorption of ROH (D) on SiO<sub>2</sub>. Exp. 2: Measurement of reaction of NaOR with Si-OH on SiO<sub>2</sub>. Exp. 3: Measurement of the coordination of the template by the reaction of NaOR on the homogeneous Ru complex (B). Exp. 4: Measurement of the coordination of the template by the reaction of NaOR on the heterogeneous Ru complex (C).

## Supporting Information 2:

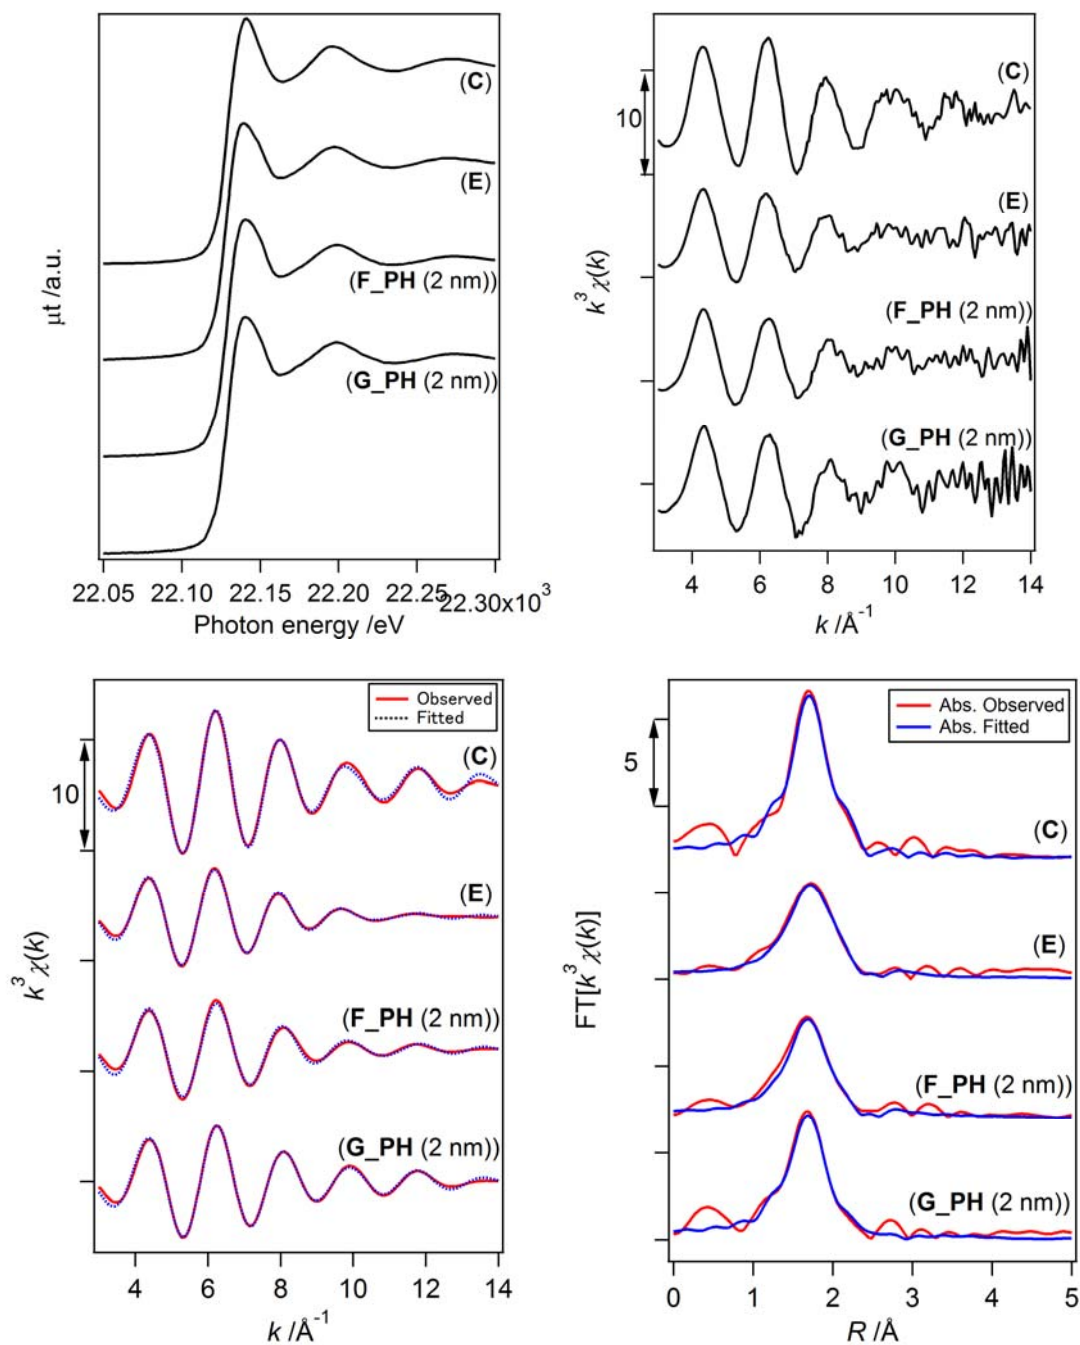

Figure Ru K-edge XAFS for (C), (E), (F<sub>PH</sub>) (2 nm height), and (G<sub>PH</sub>) (2 nm height) measured at 20 K. (Top, left) XANES, (top, right) observed EXAFS oscillations, (bottom, left) EXAFS oscillations for curve-fitting, and (bottom, right) observed EXAFS Fourier transforms.

### Supporting Information 3:

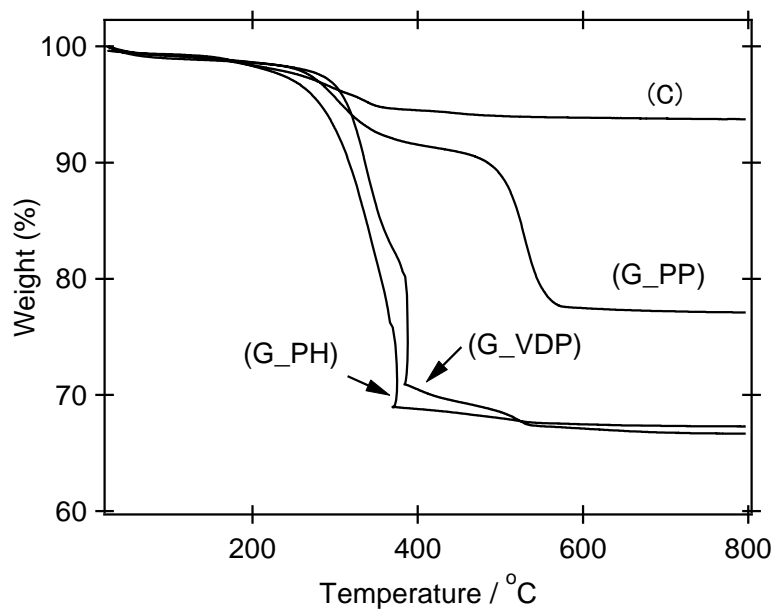

Figure TGA analyses for (C), (G\_PH) (2 nm height), (G\_VDP) (2 nm height), and (G\_PP) (2 nm height).

### Supporting Information 4:

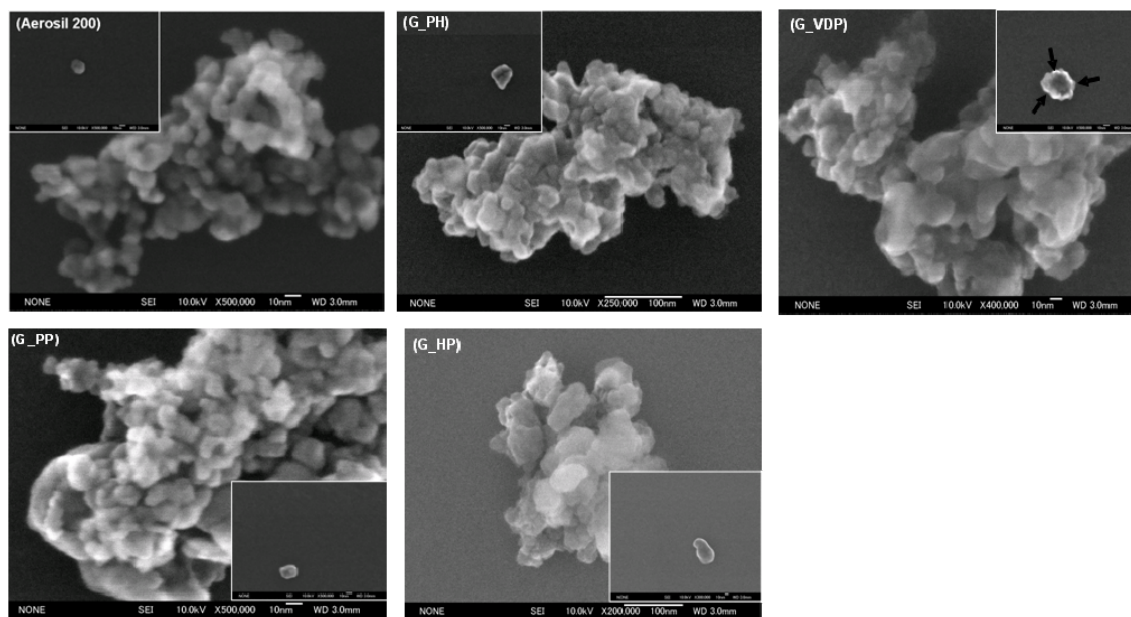

Figure SEM images of Aerosil 200 (support) and the molecularly imprinted catalysts (G\_PH, G\_VDP, G\_PP, and G\_HP) (2 nm height).

## Supporting Information 5:

HPLC charts of Table 3

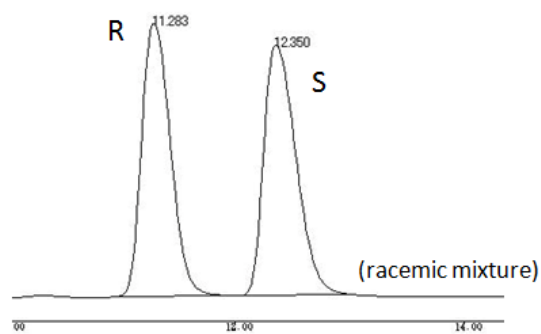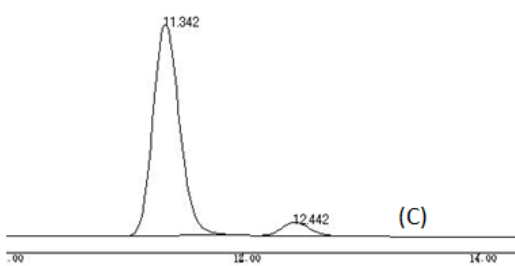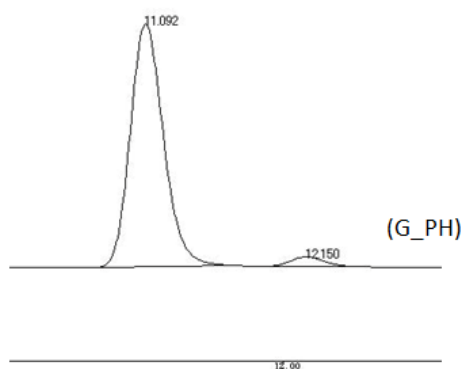

Entry 1  
Chiralcel OB-H, IPA/n-hexane = 4/96, 1.0 ml/min, 303 K  
UV detector

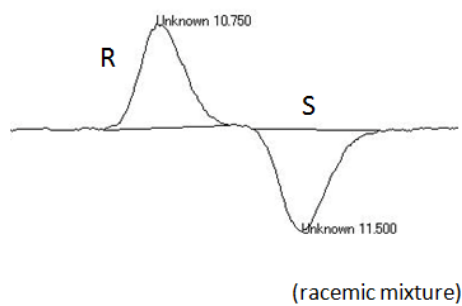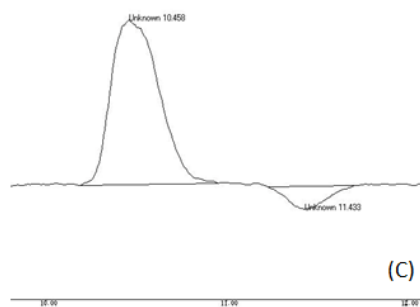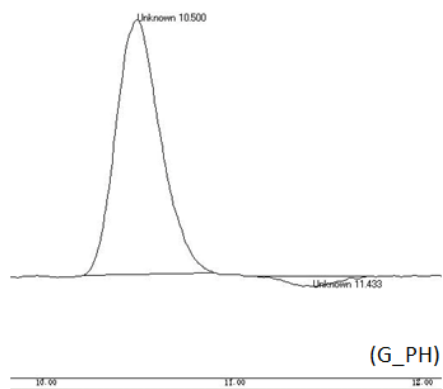

Entry 2  
Chiralcel OD-H, IPA/n-hexane = 2/98, 1.0 ml/min, 303 K  
CD detector

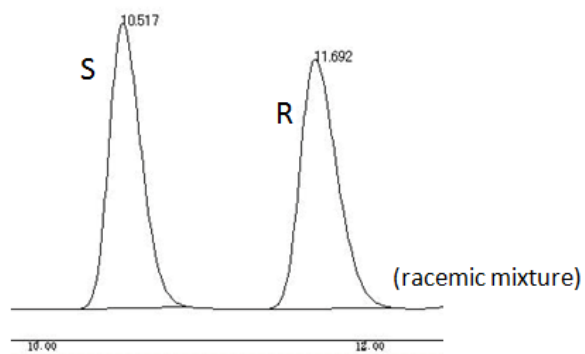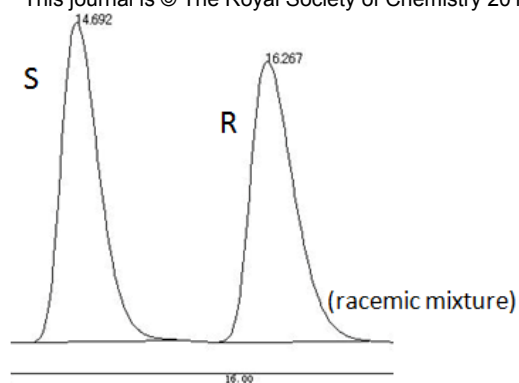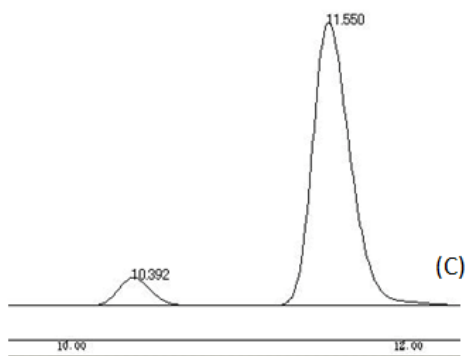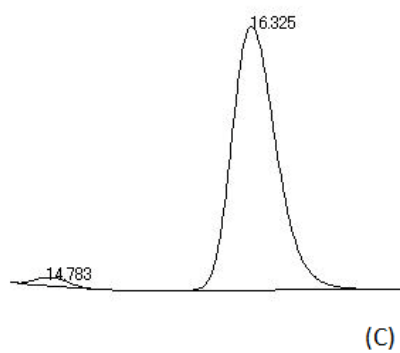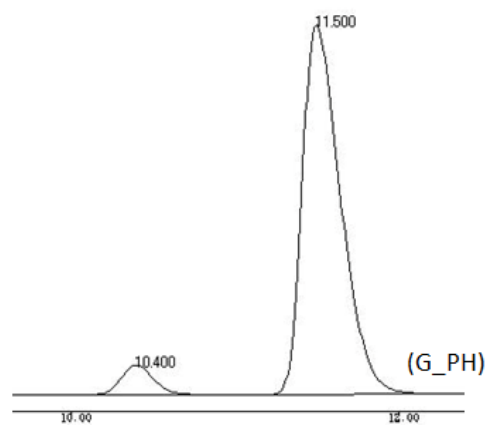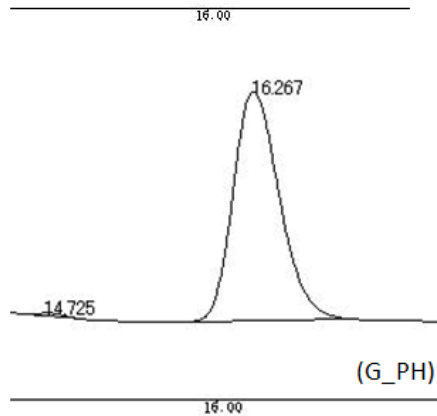

Entry 3  
Chiralcel OB-H, IPA/n-hexane = 3/97, 1.0 ml/min, 303 K  
UV detector

Entry 4  
Chiralcel OD-H, IPA/n-hexane = 2/98, 1.0 ml/min, 303 K  
UV detector

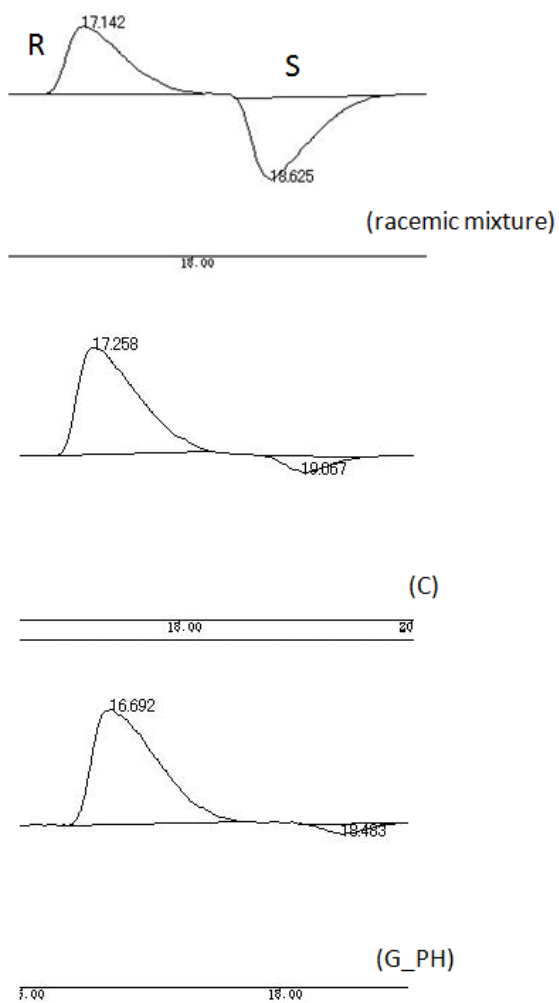

Entry 5  
Chiralcel OD-H, IPA/n-hexane = 1/99, 1.0 ml/min, 303 K  
CD detector

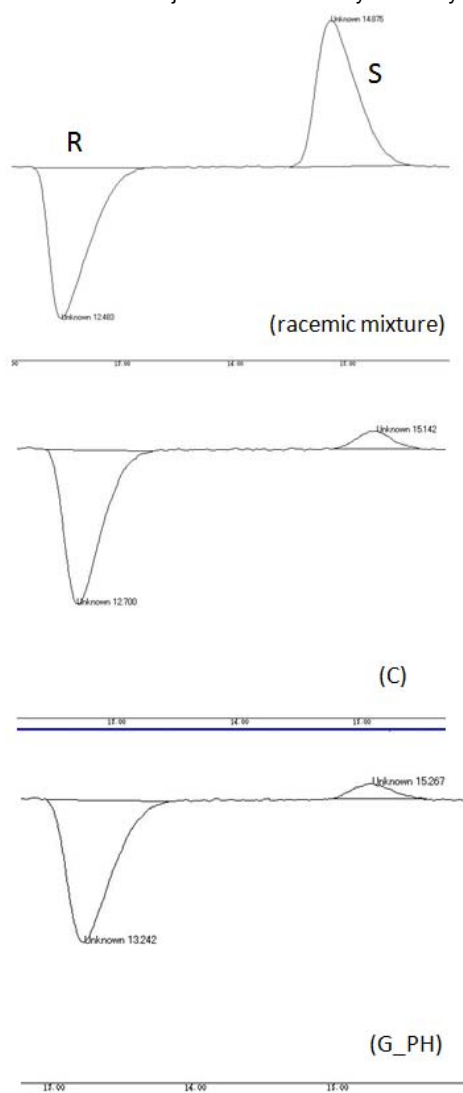

Entry 6  
Chiralcel OD-H, IPA/n-hexane = 2/98, 1.0 ml/min, 303 K  
CD detector

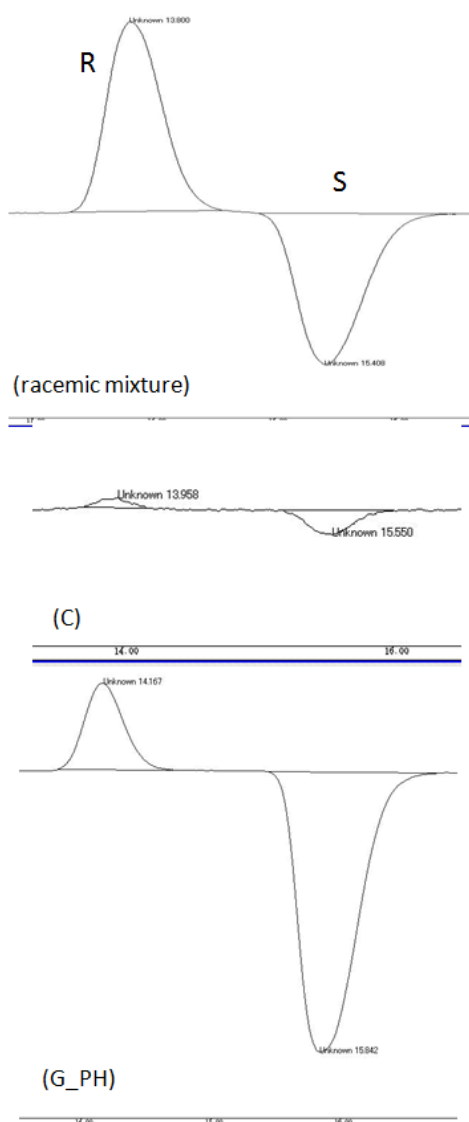

Entry 7  
Chiralcel OD-H, IPA/n-hexane = 3/97, 1.0 ml/min, 303 K  
CD detector

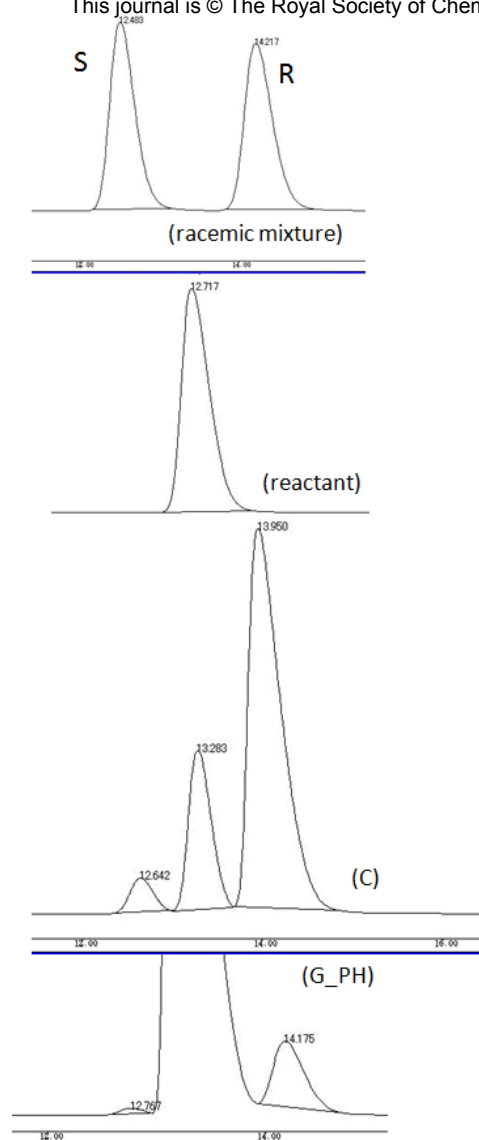

Entry 8  
Chiralcel OB-H, IPA/n-hexane = 5/95, 1.0 ml/min, 303 K  
UV detector
